# Supplementary material
Source: publisher figshare collection journal article supplement (https://acs.figshare.com/ndownloader/files/9770146)
Supplement: Supplementary file 1 [file 9770146]

# Phosphorylation versus O-GlcNAcylation: Computational Insights into the Differential Influences of the Two Competitive Post- Translational Modifications

Lata Rani and Sairam S. Mallajosyula\*

Department of Chemistry, Indian Institute of Technology Gandhinagar, Palaj,  
Gandhinagar, Gujarat, India - 382355

E-mail: [msairam@iitgn.ac.in](mailto:msairam@iitgn.ac.in)

Phone: +91 - 79 – 2395 2459

## **SUPPORTING INFORMATION**

Table S1: Dimensions of the water boxes used in the dipeptide simulations.

| <b>Dipeptide</b>      | <b>Water box size (<math>\text{\AA}^3</math>)</b> |
|-----------------------|---------------------------------------------------|
| Ser                   | 37×37×37                                          |
| Thr                   | 37×37×37                                          |
| SEP                   | 37×37×37                                          |
| TPO                   | 37×37×37                                          |
| $\beta$ -O-GlcNAc (S) | 31×31×31                                          |
| $\beta$ -O-GlcNAc (T) | 31×31×31                                          |

Table S2: Dihedral values ( $\phi$ ) for the central two residues calculated from the NMR J-coupling data.

|                | $\phi$ (C-N-C $\alpha$ -C) |                         |                          |
|----------------|----------------------------|-------------------------|--------------------------|
| <b>Residue</b> | <b>KSPP</b>                | <b>KS<sub>p</sub>PP</b> | <b>KS<sub>OG</sub>PP</b> |
| <b>S</b>       | -82°                       | -83°                    | -83°                     |
| <b>P</b>       | -80°                       | -71°                    | -77°                     |
| <b>Residue</b> | <b>KTPP</b>                | <b>KT<sub>p</sub>PP</b> | <b>KT<sub>OG</sub>PP</b> |
| <b>T</b>       | -80°                       | -82°                    | -82°                     |
| <b>P</b>       | -87°                       | -51°                    | -77°                     |

Table S3: Dimensions of the water boxes used in the model peptide simulations. All sizes are in Å<sup>3</sup>.

|               | Unmodified | Phosphorylated | O-GlcNAcylated |
|---------------|------------|----------------|----------------|
| AKAAAKAAAKAA  | 56×56×56   | ---            | ---            |
| AKAASAKAAAKAA | 55×55×55   | 55×55×55       | 110×110×110    |
| AKAATAKAAAKAA | 55×55×55   | 55×55×55       | 109×109×109    |
| KSP           | 47×47×47   | 44×44×44       | 48×48×48       |
| KTP           | 59×59×59   | 39×39×39       | 53×53×53       |

Table S4: <sup>3</sup>J<sub>αN</sub> coupling constants obtained from dipeptide MD simulations.

| <sup>3</sup> J <sub>αN</sub> | Experimental        | Theoretical <sup>d</sup> |
|------------------------------|---------------------|--------------------------|
| Ser                          | 7.0 Hz <sup>a</sup> | 7.7± 1.7 Hz              |
| Thr                          | 7.4 Hz <sup>a</sup> | 7.5± 1.7 Hz              |
| SEP                          | 5.9 Hz <sup>b</sup> | 6.7± 1.8 Hz              |
| TPO                          | 5.0 Hz <sup>b</sup> | 7.2± 1.7 Hz              |
| O-GlcNAc (S)                 | 6.8 Hz <sup>c</sup> | 7.2± 3.1 Hz              |
| O-GlcNAc (T)                 | 7.5 Hz <sup>c</sup> | 7.5± 2.8 Hz              |

<sup>a</sup> Experimental <sup>3</sup>J<sub>αN</sub> coupling constants obtained from Ref 68.

<sup>b</sup> Experimental <sup>3</sup>J<sub>αN</sub> coupling constants evaluated at a pH of 8.0 obtained from Ref 58.

<sup>c</sup> Experimental <sup>3</sup>J<sub>αN</sub> coupling constants obtained from Ref 14.

<sup>d</sup> Theoretical coupling constants calculated using the Karplus equations (1) and (2).

Table S5: Percentage populations of the  $\beta$ -sheet and PPII conformations.

| Peptide             | Percentage population |       |
|---------------------|-----------------------|-------|
|                     | $\beta$ -sheet        | PPII  |
| KSPP                | 29.26                 | 65.34 |
| KS <sub>p</sub> PP  | 2.96                  | 84.47 |
| KS <sub>OG</sub> PP | 23.13                 | 71.48 |
| KTPP                | 25.92                 | 69.87 |
| KT <sub>p</sub> PP  | 2.96                  | 84.47 |
| KT <sub>OG</sub> PP | 23.13                 | 71.48 |

Table S6: Distribution of the  $\chi$  dihedral (N-C $\alpha$ -C $\beta$ -OG) in the three conformational bins, g+, g- and anti for KTPP, KT<sub>p</sub>PP and KT<sub>OG</sub>PP peptides. The average value of the dihedral in the conformational bins and the associated value of the J<sub>H•H $\beta$</sub>  coupling constant are also presented.

| Peptide             | g+ (60°) <sup>a</sup> |                |                                    | g- (-60°) <sup>a</sup> |                |                                    | anti (180°) <sup>a</sup> |                |                                    |
|---------------------|-----------------------|----------------|------------------------------------|------------------------|----------------|------------------------------------|--------------------------|----------------|------------------------------------|
|                     | Average               | Population (%) | J <sub>H•H<math>\beta</math></sub> | Average                | Population (%) | J <sub>H•H<math>\beta</math></sub> | Average                  | Population (%) | J <sub>H•H<math>\beta</math></sub> |
| KTPP                | 46.2                  | 45             | 4.5                                | -54.8                  | 36             | 10.0                               | 165.0                    | 19             | 4.7                                |
| KT <sub>p</sub> PP  | 53.0                  | 5              | 4.6                                | -47.3                  | 95             | 9.9                                | -                        | -              | -                                  |
| KT <sub>OG</sub> PP | -                     | -              | -                                  | -61.3                  | 83             | 10.0                               | 150.6                    | 17             | 5.0                                |

<sup>a</sup> Definition of the conformational bins: g+ (0°< $\chi$ <120°), g- (-120°< $\chi$ <0°), anti (-180°< $\chi$ <-120° or 120°< $\chi$ <180°)

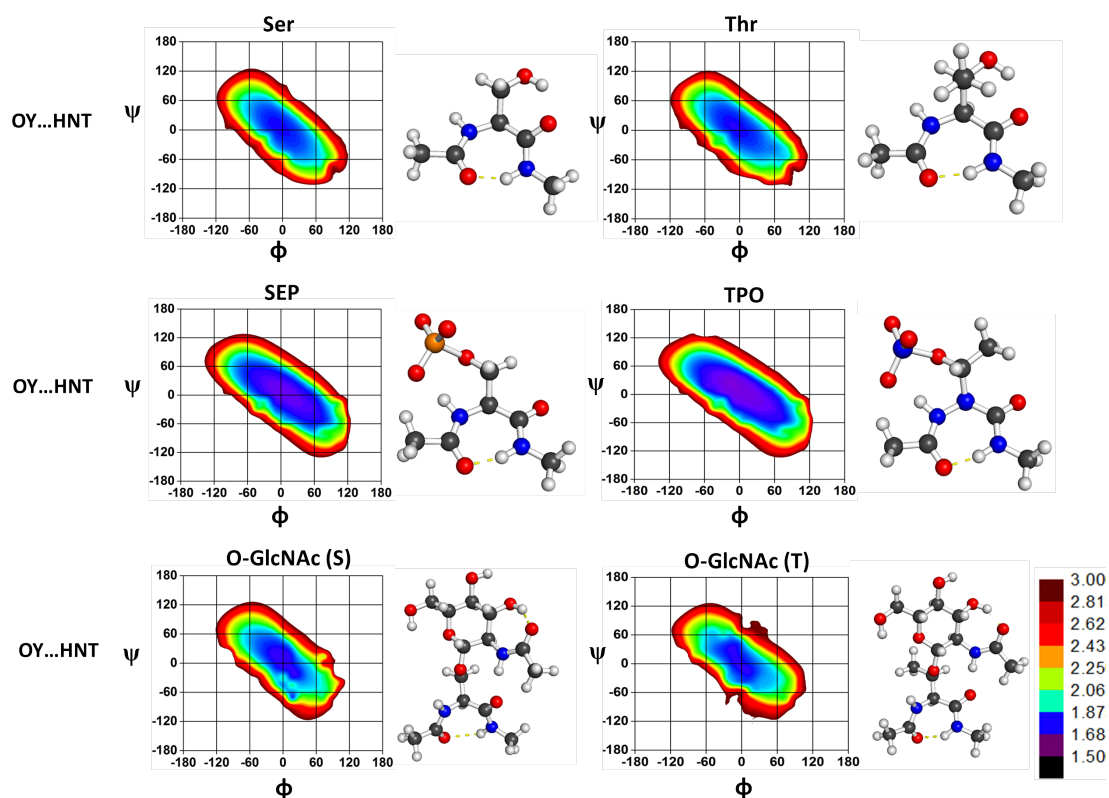

Figure S1: 2D distribution of the OY...HNT H-bond distances as a function of  $\phi/\psi$  dihedrals for all the dipeptides. Structures exhibiting the OY...HNT H-bond have been presented for illustration. The distances are presented in Å, with contours every 0.25 Å. Only distances between the range 1.25 Å - 3.0 Å have been plotted for the sake of clarity.

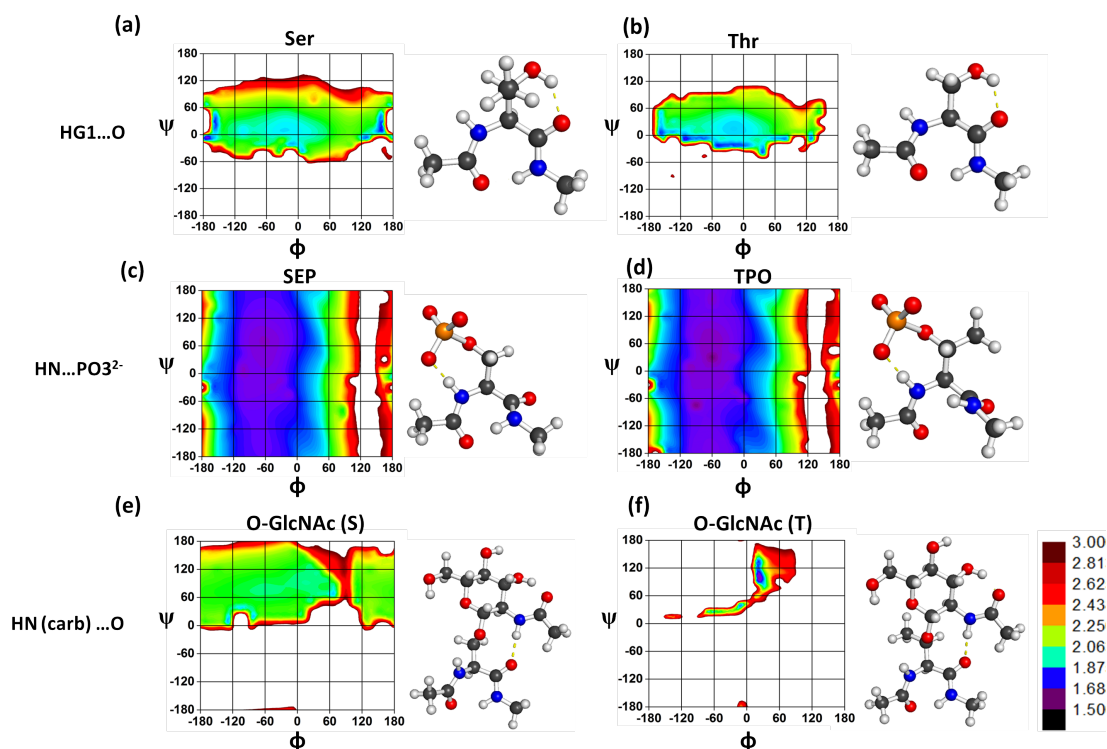

Figure S2: 2D distribution of HG1...O H-bond distances as a function of  $\phi/\psi$  dihedrals for (a) Ser and (b) Thr dipeptides. 2D distribution of HN...OP H-bond distances as a function of  $\phi/\psi$  dihedrals for (c) SEP and (d) TPO dipeptides. 2D distribution of HN<sub>carb</sub>...O H-bond distances as a function of  $\phi/\psi$  dihedrals for (e) O-GlcNAc (S) and (f) O-GlcNAc (T) dipeptides. Structures exhibiting the described H-bonds have been presented for illustration. The distances are presented in Å, with contours every 0.25 Å. Only distances between the range 1.25 Å - 3.0 Å have been plotted for the sake of clarity.

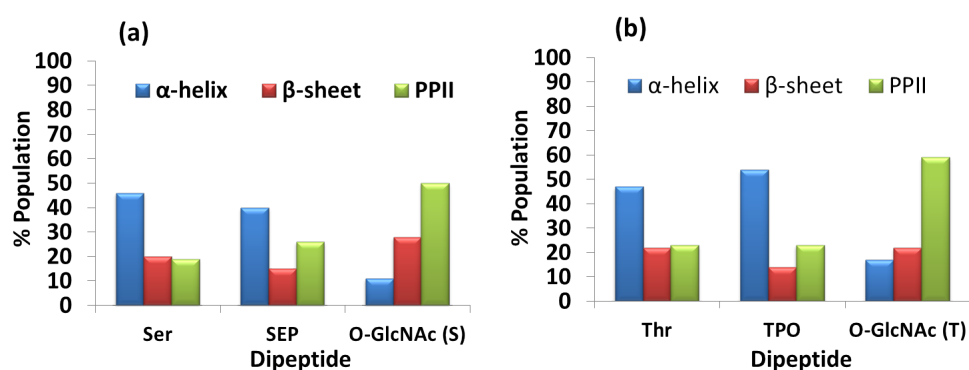

Figure S3: Relative population distributions in the  $\alpha$ -helix,  $\beta$ -sheet and PPII-helical regions for (a) Ser/SEP/O-GlcNAc (S) and (b) Thr/TPO/O-GlcNAc (T) from dipeptide MD simulations.

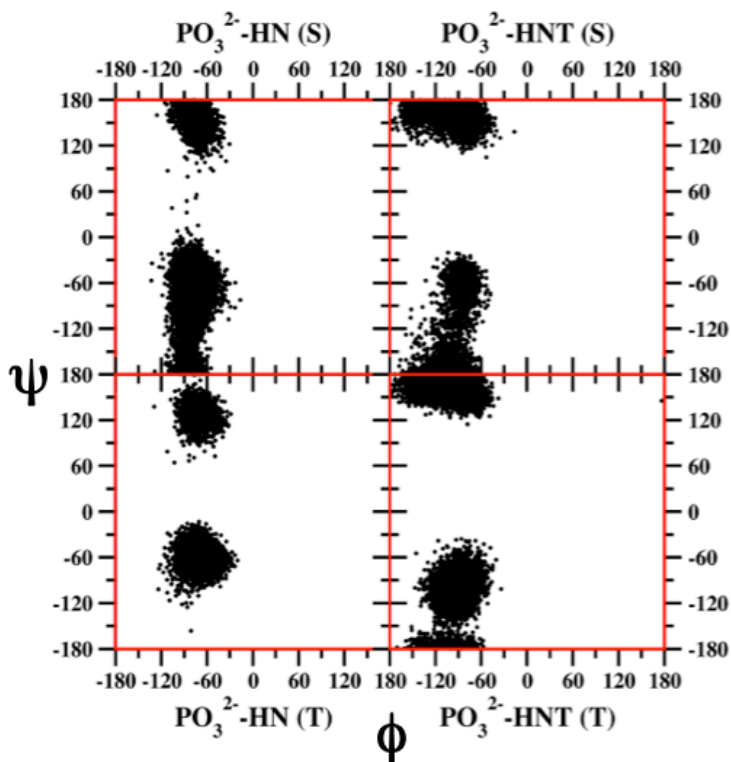

Figure S4:  $\phi/\psi$  distributions corresponding to  $\text{PO}_3^{2-}\text{-HN}$  and  $\text{PO}_3^{2-}\text{-HNT}$  H-bonded structures ( $d_{\text{H-bond}} < 3.0 \text{ \AA}$ ) from SEP and TPO dipeptide simulations.

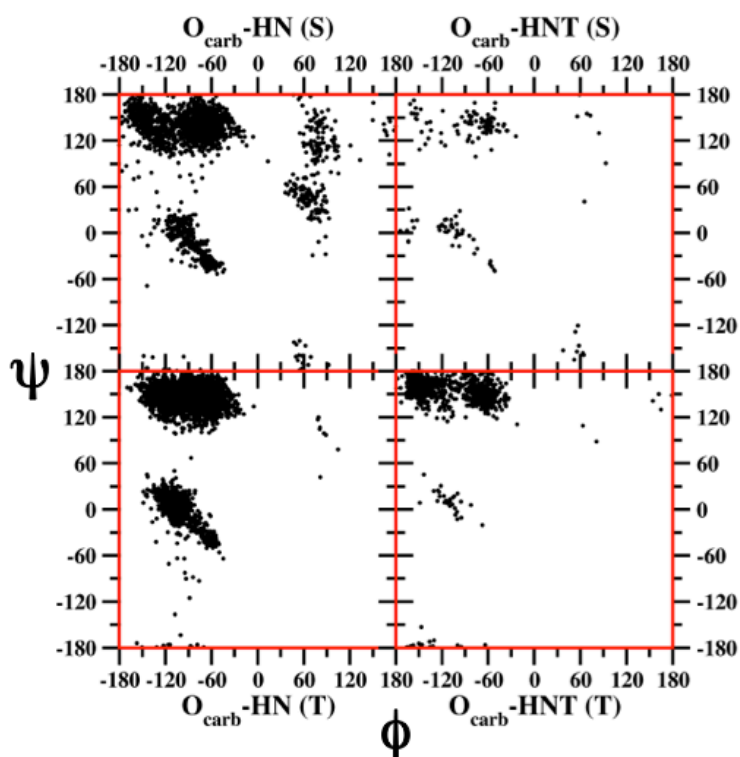

Figure S5:  $\phi/\psi$  distributions corresponding to  $\text{O}_{\text{carb}}\text{-HN}$  and  $\text{O}_{\text{carb}}\text{-HNT}$  H-bonded structures ( $d_{\text{H-bond}} < 3.0 \text{ \AA}$ ) from O-GlcNAc (S) and O-GlcNAc (T) dipeptide simulations.

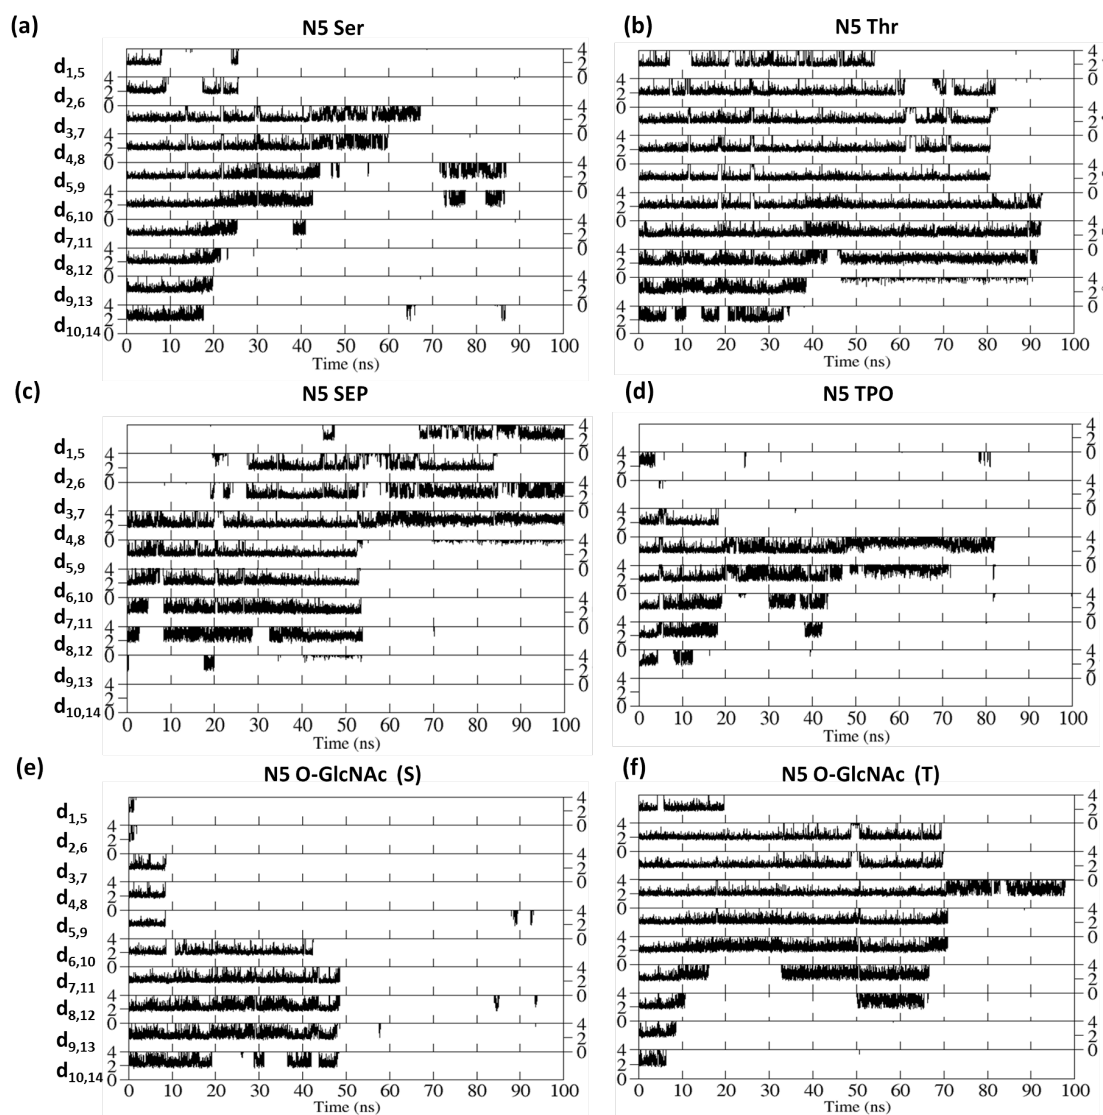

Figure S6:  $d_{i, i+4}$  backbone O...HN H-bond distances ( $d_{\text{H-bond}} < 4.0 \text{ \AA}$ ) from the Baldwin peptide simulations. (a) N5 Ser, (b) N5 Thr, (c) N5 SEP, (d) N5 TPO, (e) N5 O-GlcNAc (S) and (f) N5 O-GlcNAc (T). All distances are in Å.



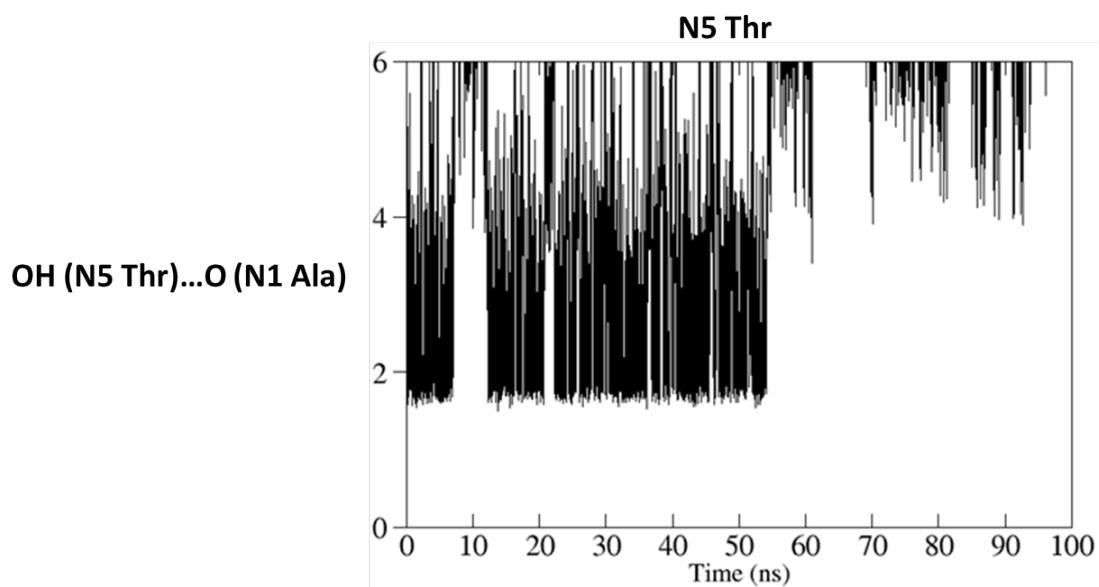

Figure S7: OH (N5 Thr)...O (N1 Ala) H-bond distances ( $d_{\text{H-bond}} < 6.0 \text{ \AA}$ ) from the N5 Thr Baldwin peptide simulations. Distances are in  $\text{\AA}$ .

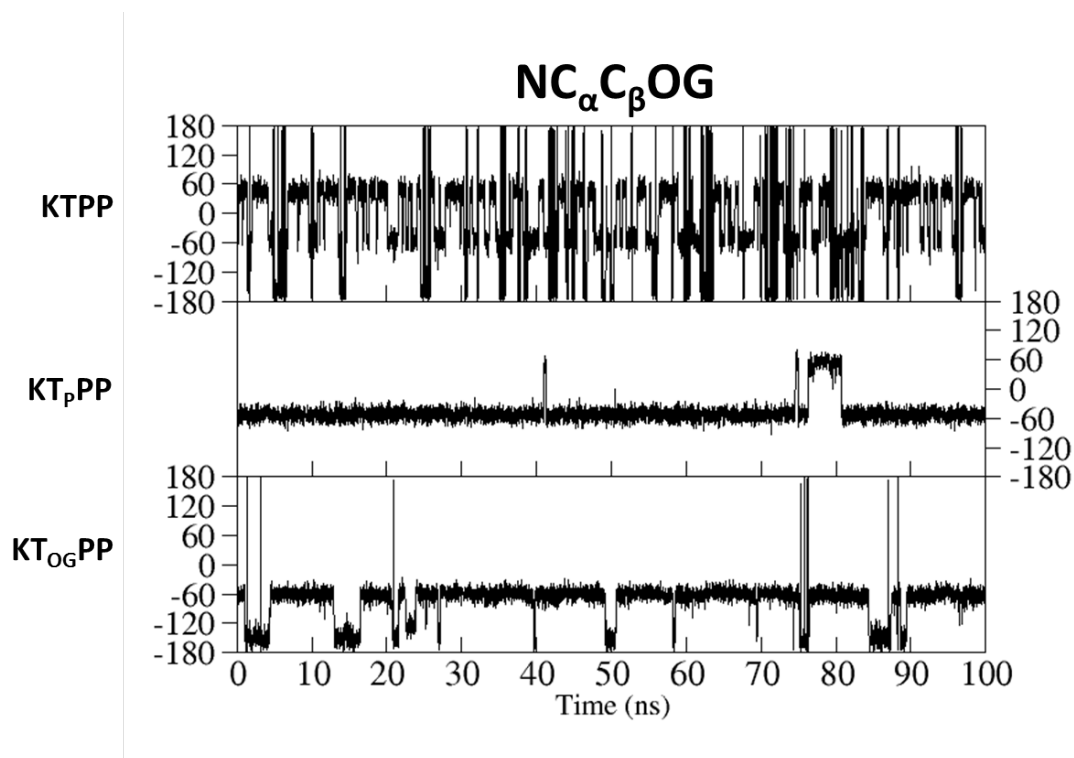

Figure S8:  $\text{NC}_\alpha\text{C}_\beta\text{OG}$  time series corresponding to KTPP,  $\text{KT}_p\text{PP}$  and  $\text{KT}_{\text{OG}}\text{PP}$ . Dihedral values are reported in  $^\circ$ .

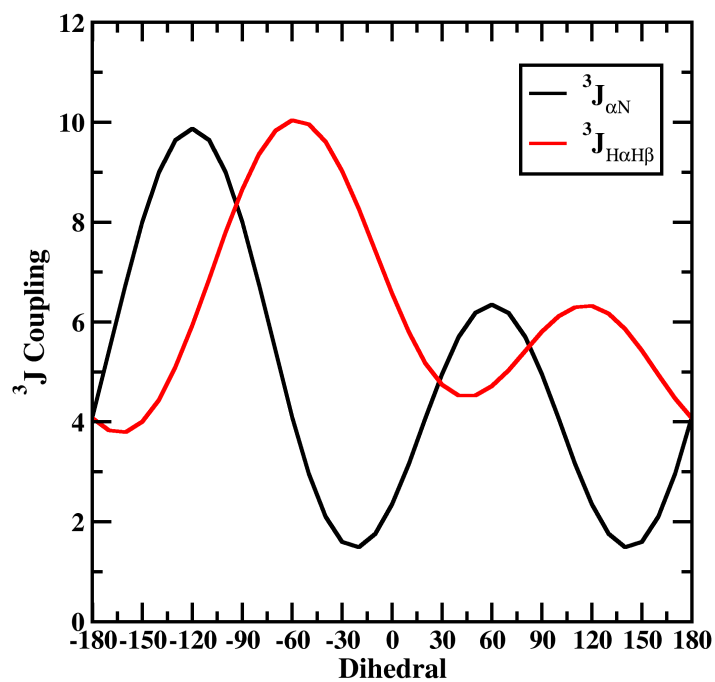

Figure S9: Karplus curves corresponding to the  $^3J$  coupling constant as a function of dihedral values evaluated using equation (1) and (2).  $^3J_{\alpha N}$  corresponds to the  $\phi$  (C-N-C $\alpha$ -C) dihedral values while  $^3J_{H\alpha H\beta}$  correspond to the  $\chi_1$  (N-C $\alpha$ -C $\beta$ -OG) dihedral.
